# Supplementary material for: Development of an endoplasmic reticulum-targeting fluorescent probe for the imaging of polarity in living cells and tissues
Source: Royal Society of Chemistry journal article supplement (doi:10.1039/c9nj02666e), 2019-01-01
Supplement: c9nj02666e1.pdf [file c9nj02666e1.pdf]

*Supporting information for*

**Development of an endoplasmic reticulum-targeting fluorescent probe for the  
imaging of polarity in living cells and tissues**

Wenhui Song, Baoli Dong, Yaru Lu, Xiuqi Kong, Abdul Hadi Mehmood and Weiyang Lin\*

*Institute of Fluorescent Probes for Biological Imaging, School of Chemistry and Chemical  
Engineering, School of Materials Science and Engineering, University of Jinan, Jinan, Shandong  
250022, P.R. China.*

\*Corresponding Author.

Tel.: +86 53182769108.

*E-mail address:* [weiyanglin2013@163.com](mailto:weiyanglin2013@163.com).

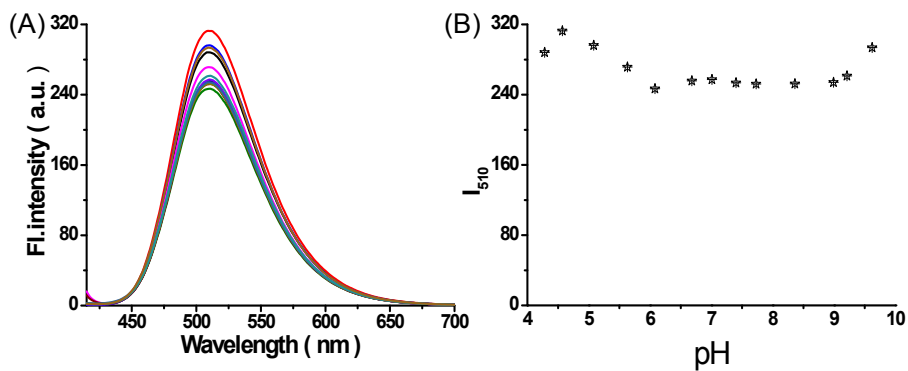

**Fig. S1.** (A) Fluorescence spectra of 5  $\mu\text{M}$  NSp at various pH. (B) Fluorescence intensities at 510 nm of 5  $\mu\text{M}$  NSp at various pH.  $\lambda_{\text{ex}} = 405$  nm

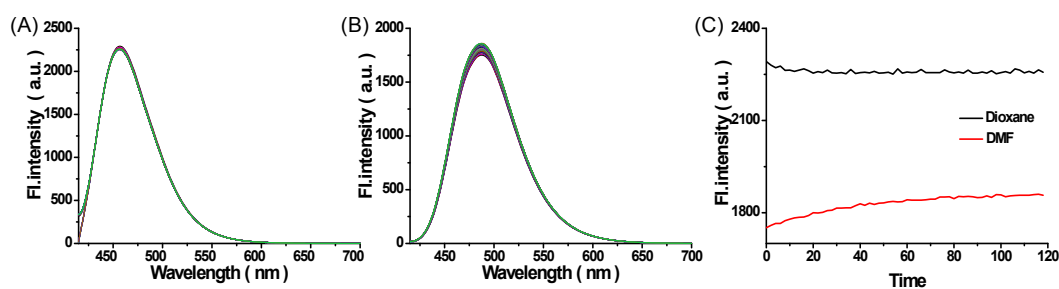

**Fig. S2.** Photostability of compound NSp at Dioxane and DMF.  $\lambda_{\text{ex}} = 405$  nm

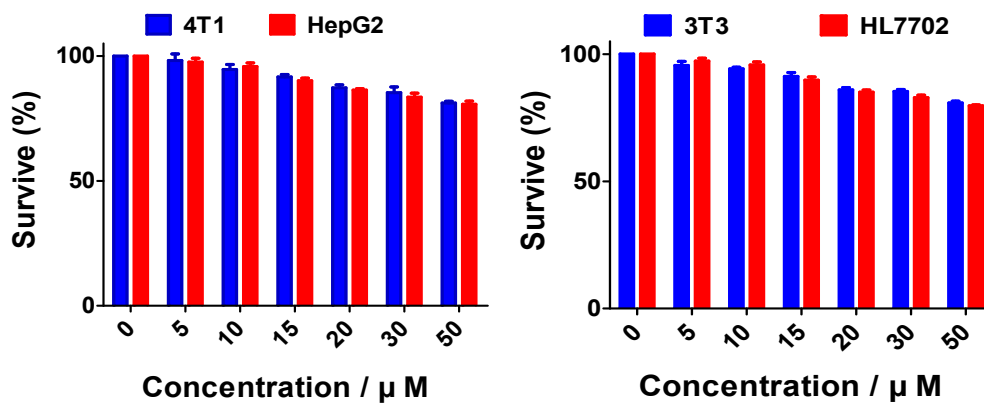

**Fig. S3.** The MTT experiments of NSp under different concentrations for 4T1 cells; 3T3 cells; HepG2 cells; HL-7702 cells.

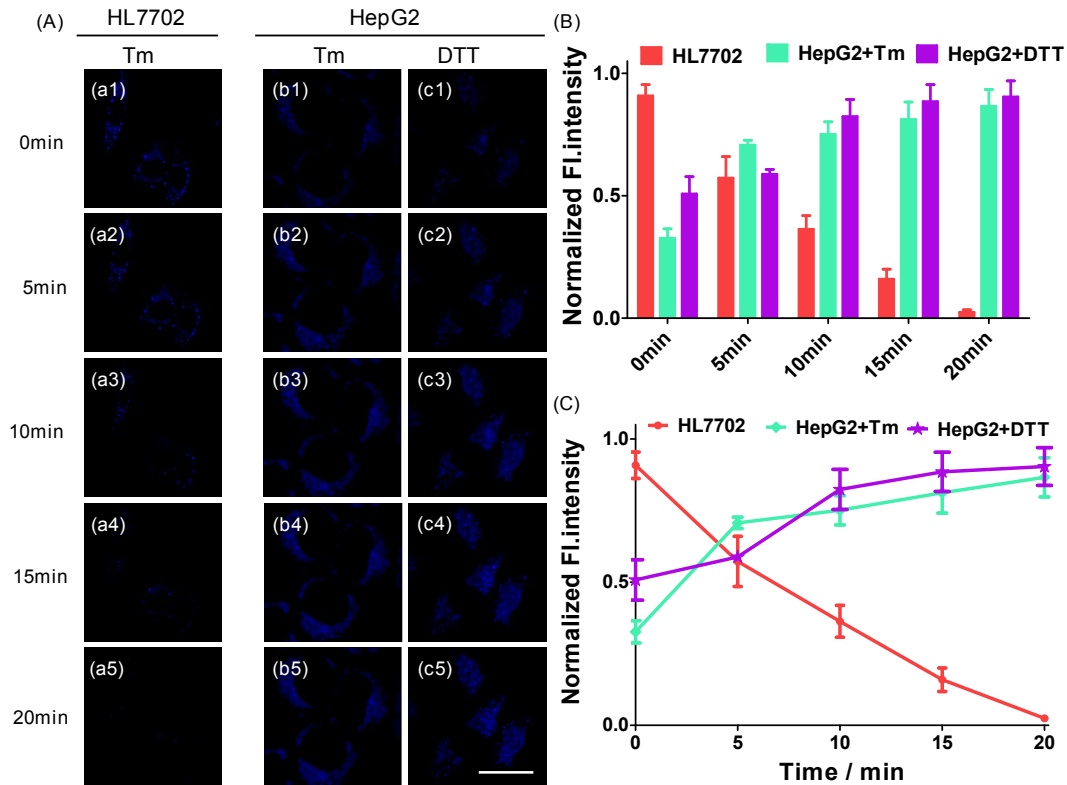

**Fig.S4** (A) Fluorescence images of NSp (5 μM) in live cells at different times after the addition of ER stress stimuli. a1–a5: Fluorescence images of NSp in HL-7702 cells after the addition of Tm (50 mg / mL). b1–b5: Fluorescence images of NSp in HepG2 cells after the addition of Tm (50 mg / mL). b1–b5: Fluorescence images of NSp in HepG2 cells after the addition of DTT (5.0 mM).  $\lambda_{ex} = 405$  nm,  $\lambda_{em} = 425 - 475$  nm, Scale bar: 20 μm. (B) Analysis of the quantitative fluorescence intensity in (A) using ImageJ software. (C) The average fluorescence intensity output of NSp at different times. Scale bar: 20 μm.

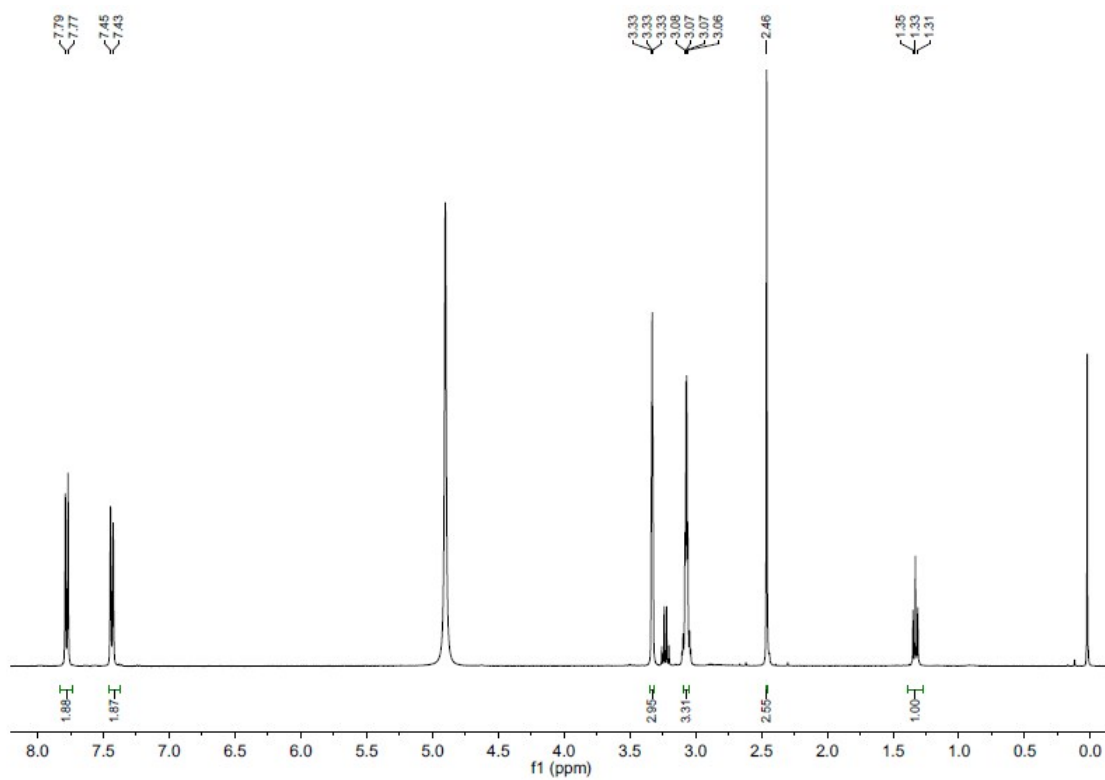

**Fig. S5.**  $^1\text{H}$ -NMR spectrum of **compound 1** in  $\text{MeOH-}d_4$ .

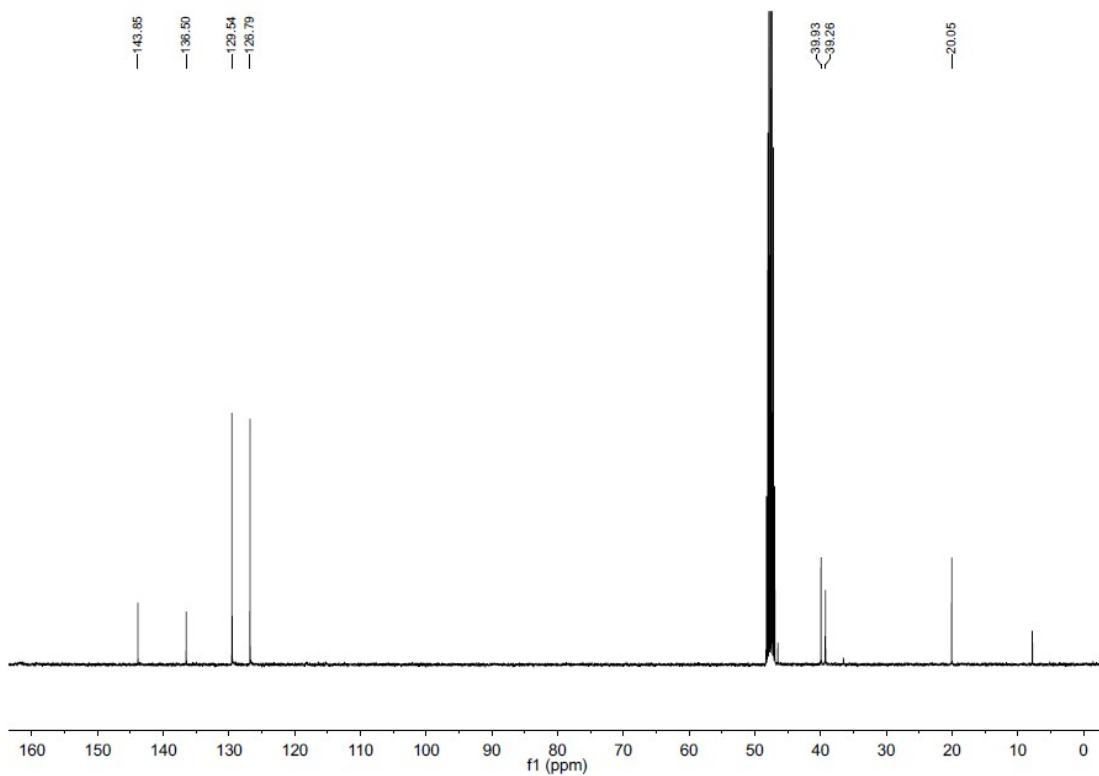

**Fig. S6.**  $^{13}\text{C}$ -NMR **compound 1** in  $\text{MeOH-}d_4$ .

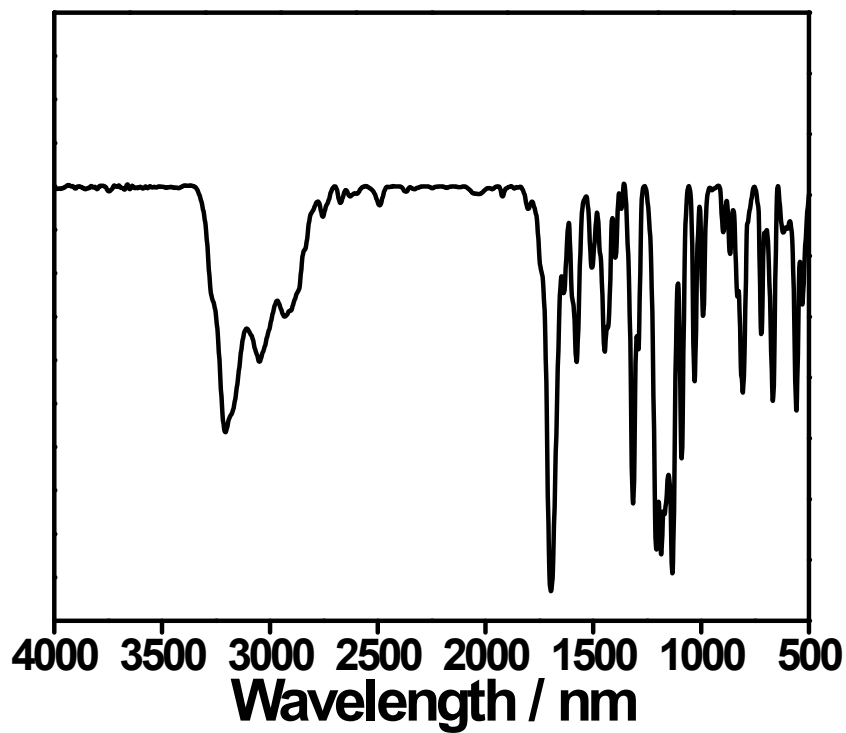

Fig. S7. FT-IR data of compound 1.

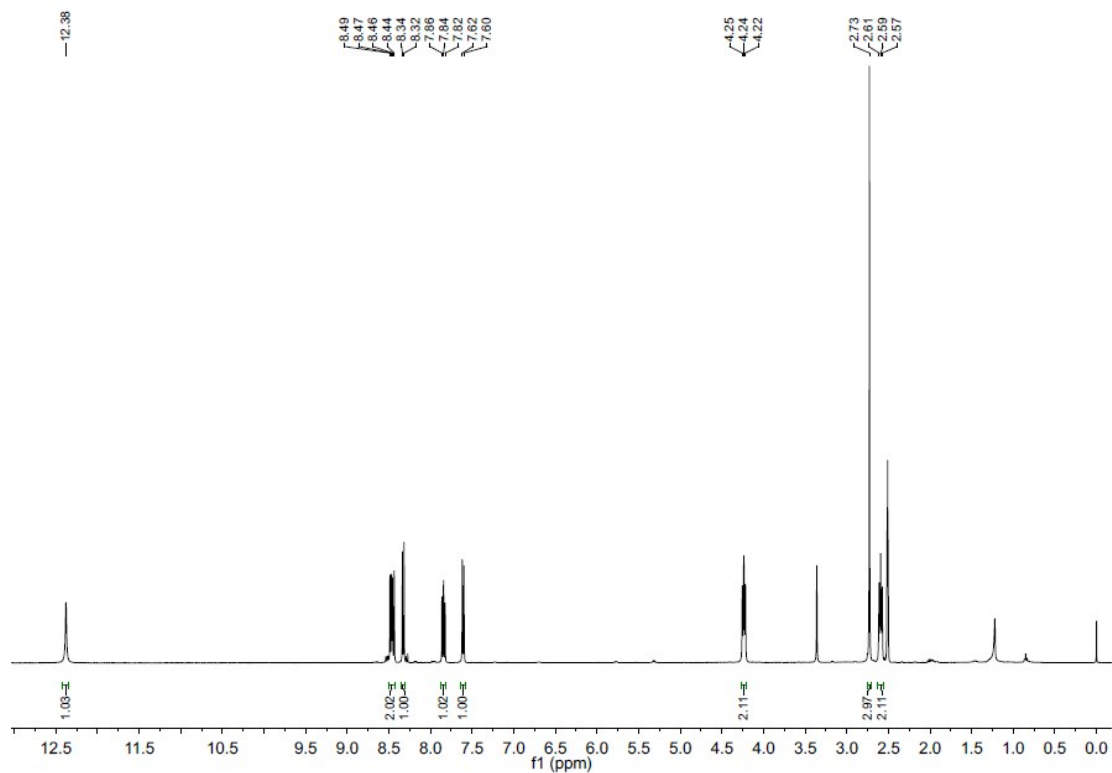

Fig. S8. <sup>1</sup>H-NMR spectrum of Compound 2 in DMSO-*d*<sub>6</sub>.

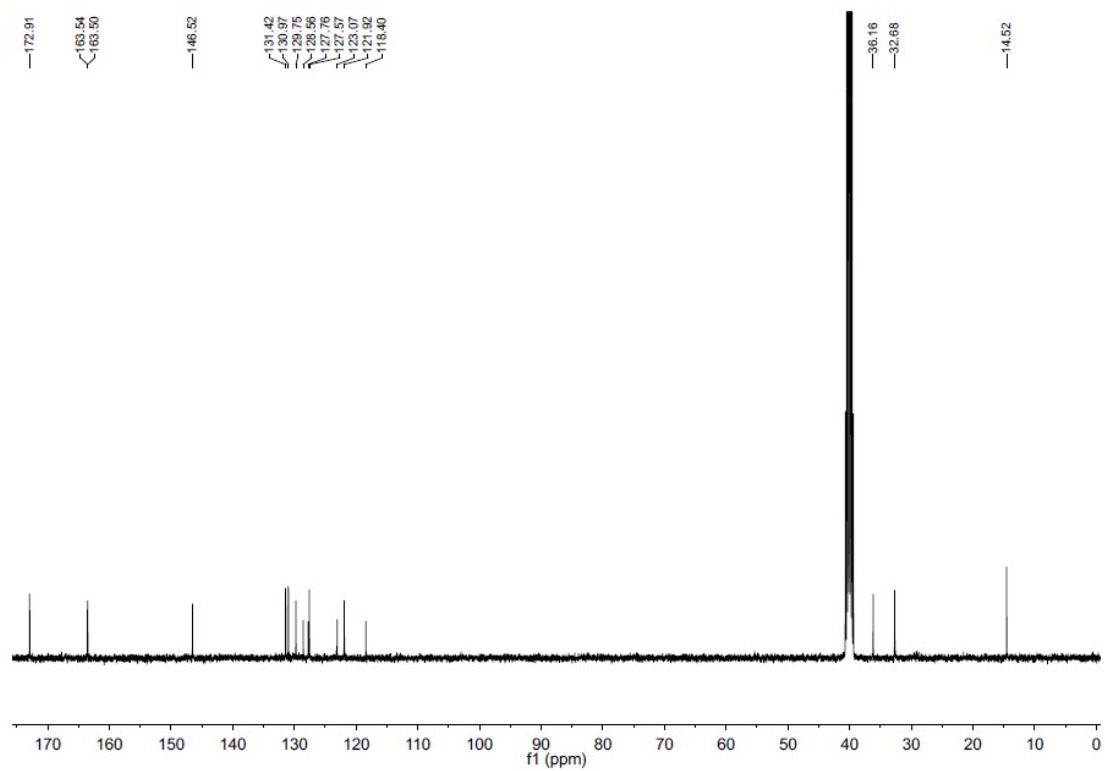

Fig. S9.  $^{13}\text{C}$ -NMR spectrum of **Compound 2** in  $\text{DMSO-}d_6$ .

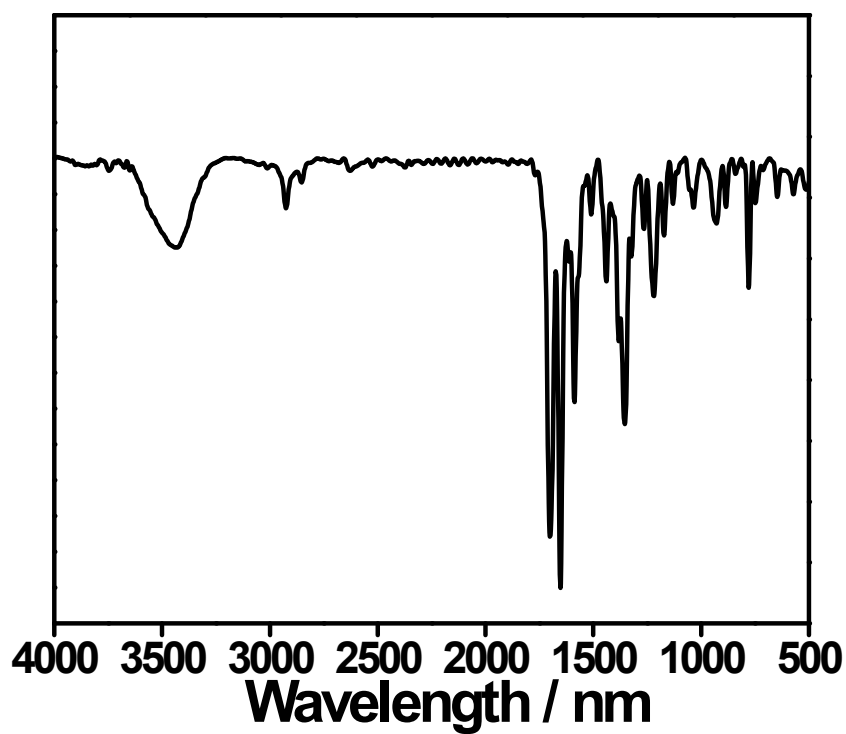

Fig. S10. FT-IR data of **compound 2**.

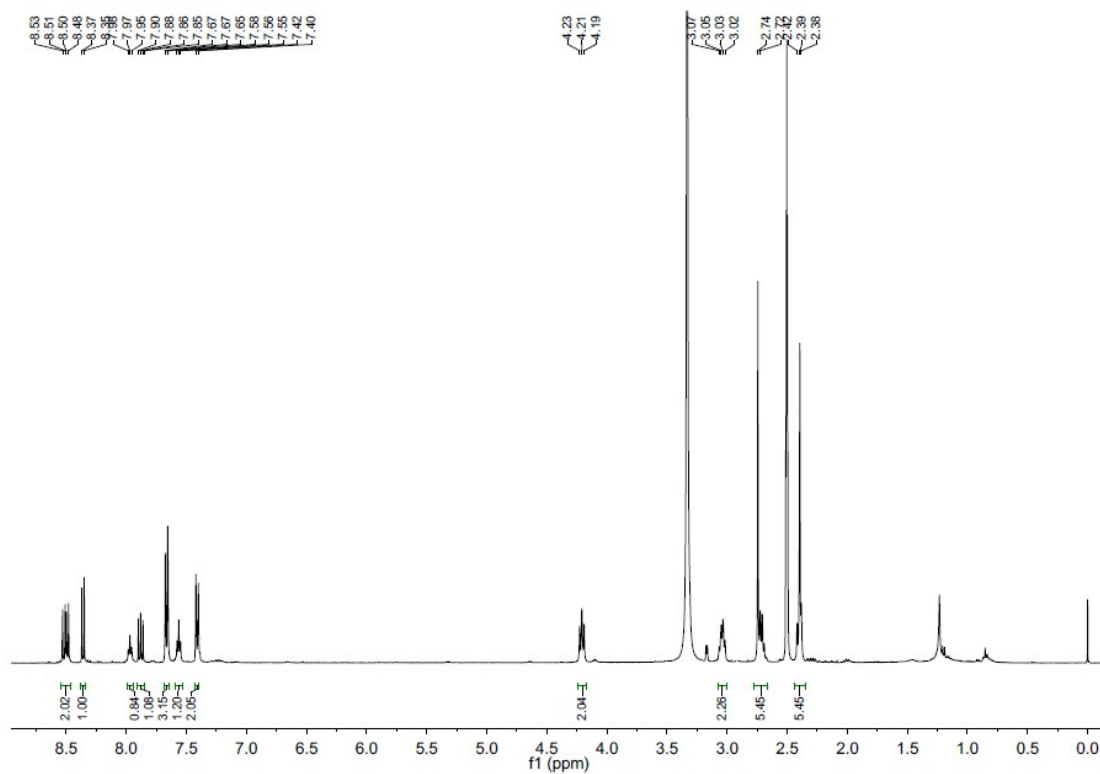

**Fig. S11.**  $^1\text{H}$ -NMR spectrum of NSp in  $\text{DMSO-}d_6$ .

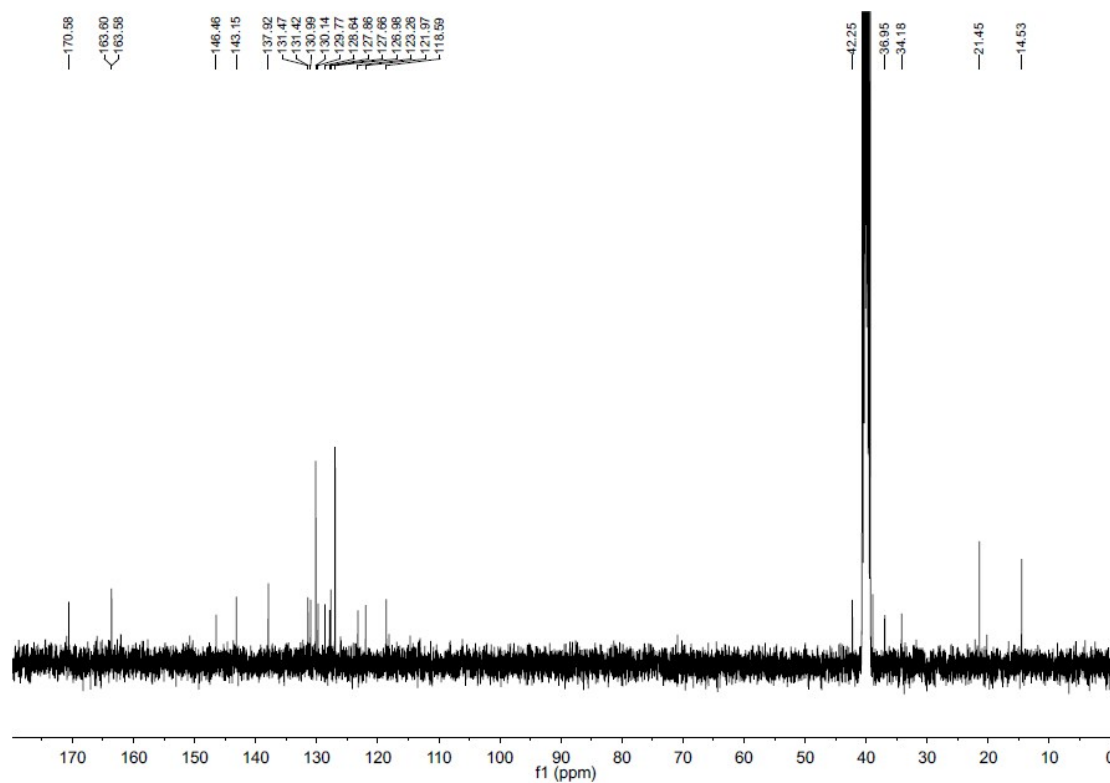

**Fig. S12.**  $^{13}\text{C}$ -NMR spectrum of NSp in  $\text{DMSO-}d_6$ .

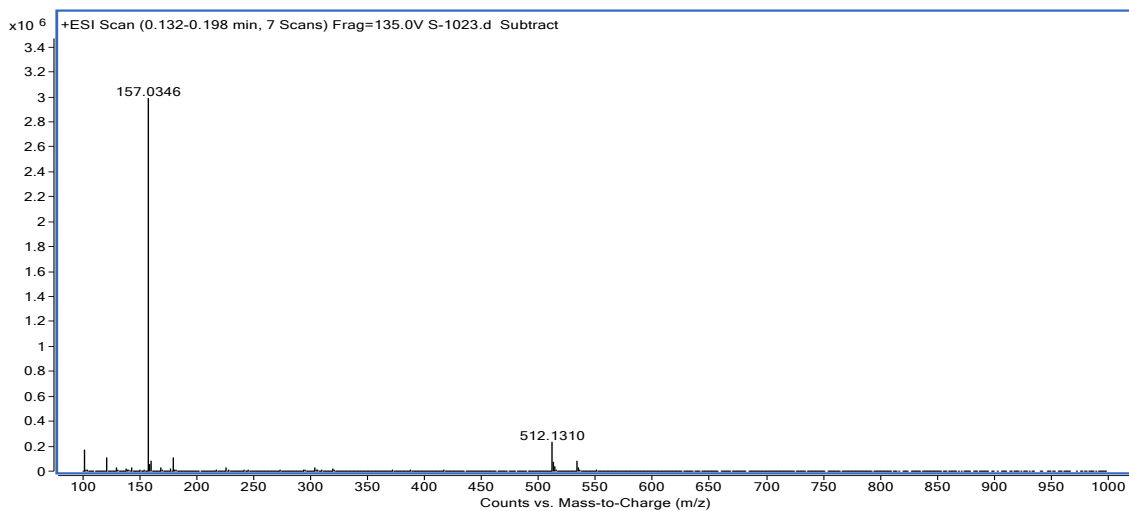

**Fig. S13.** HRMS data of the probe NSp.

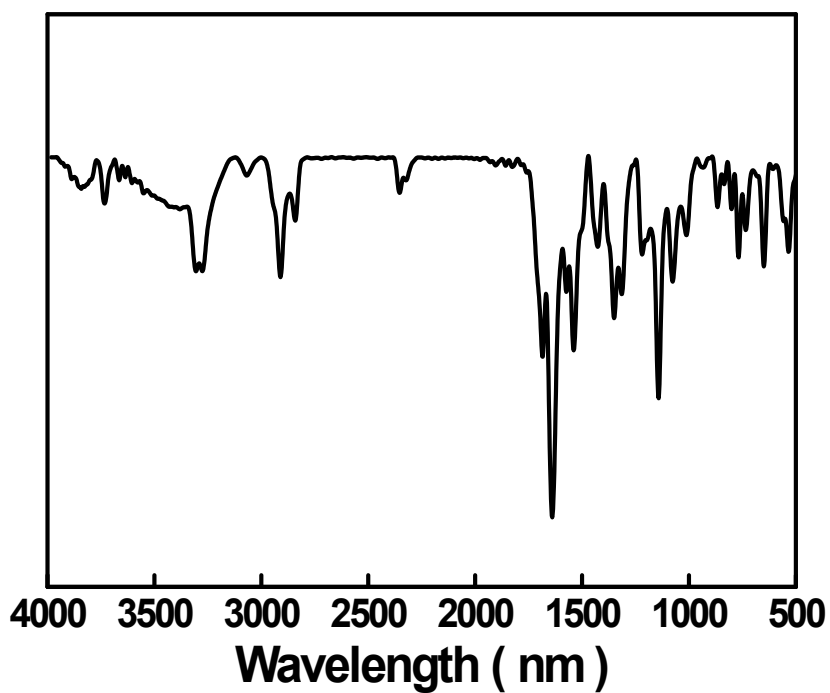

**Fig. S14.** FT-IR data of the probe NSp.
